# Supplementary material for: Human telomerase reverse transcriptase promotes the epithelial to mesenchymal transition in lung cancer cells by enhancing c-MET upregulation
Source: PubMed Central journal article supplement — Heliyon. 2021 Dec 24;8(1):e08673. doi: 10.1016/j.heliyon.2021.e08673 (PMC8732784; doi:10.1016/j.heliyon.2021.e08673), 2021-12-24

Fig. SM 1

hTERT promotes the epithelial to mesenchymal transition and cell migration in A549 And H1299 (Figure 1).

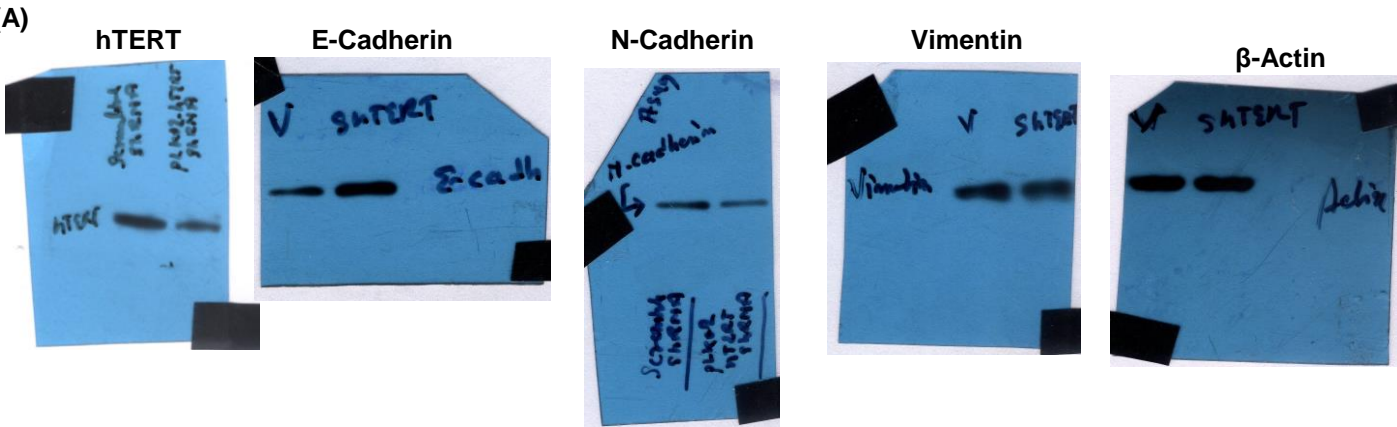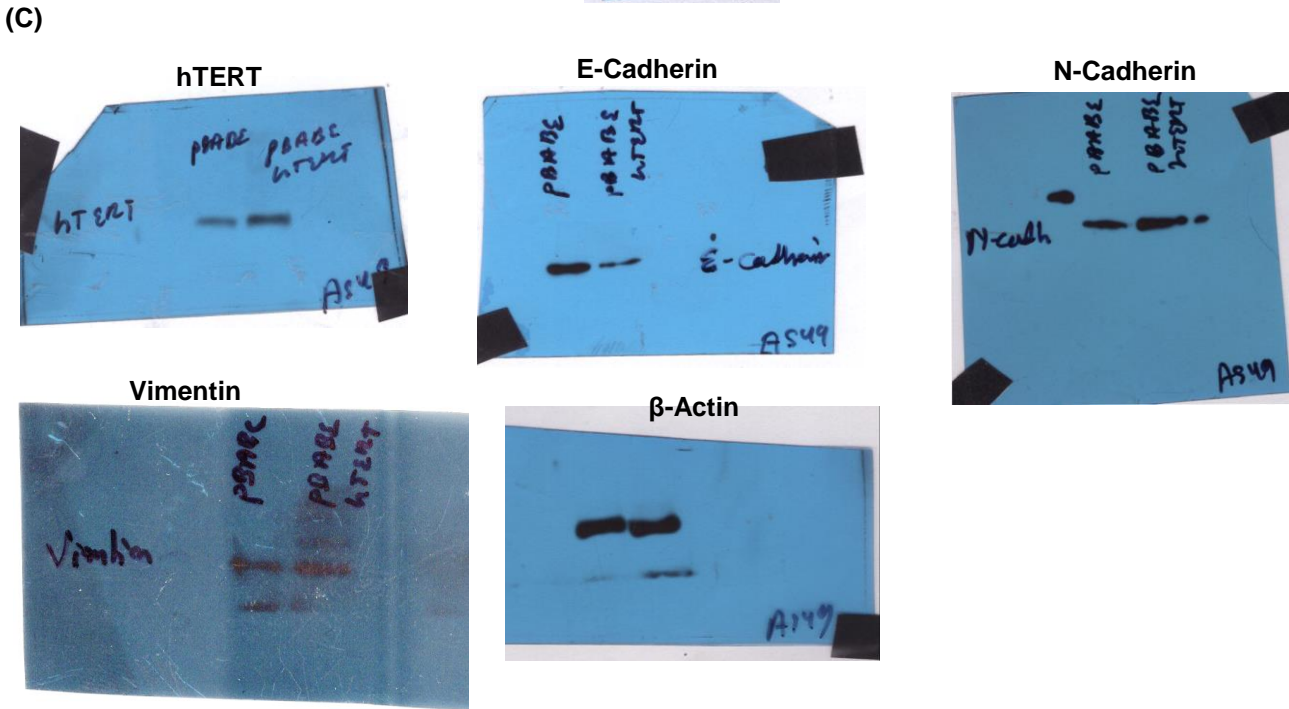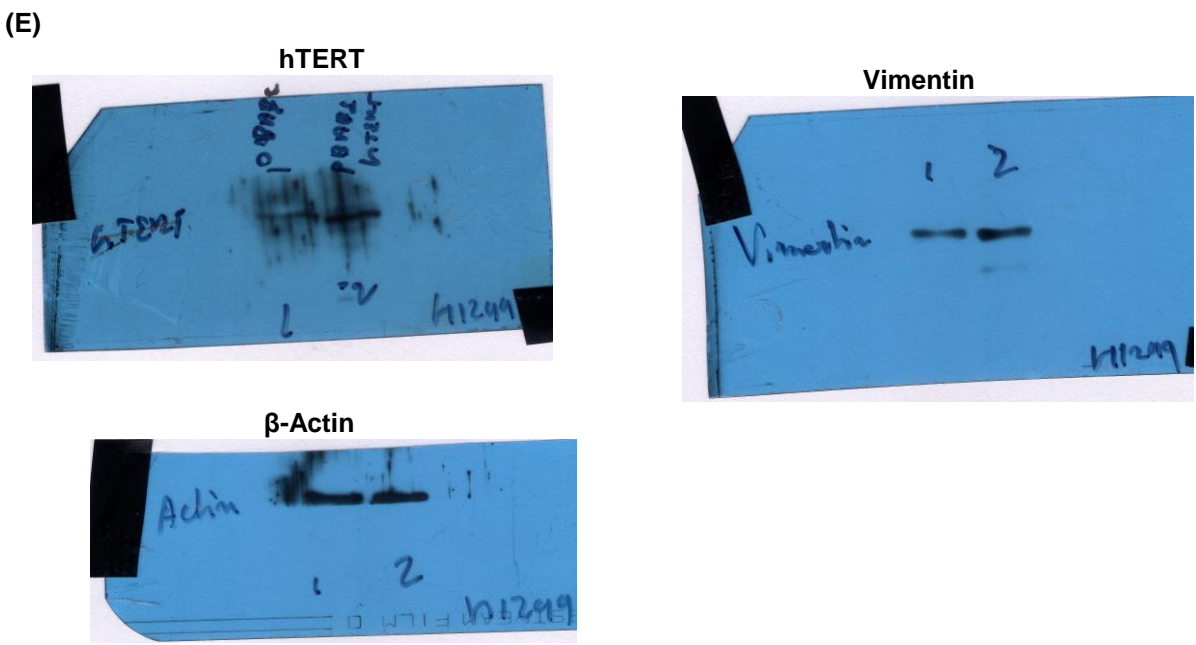

Fig. SM 2

c-MET expression is regulated by hTERT (Figure 2).

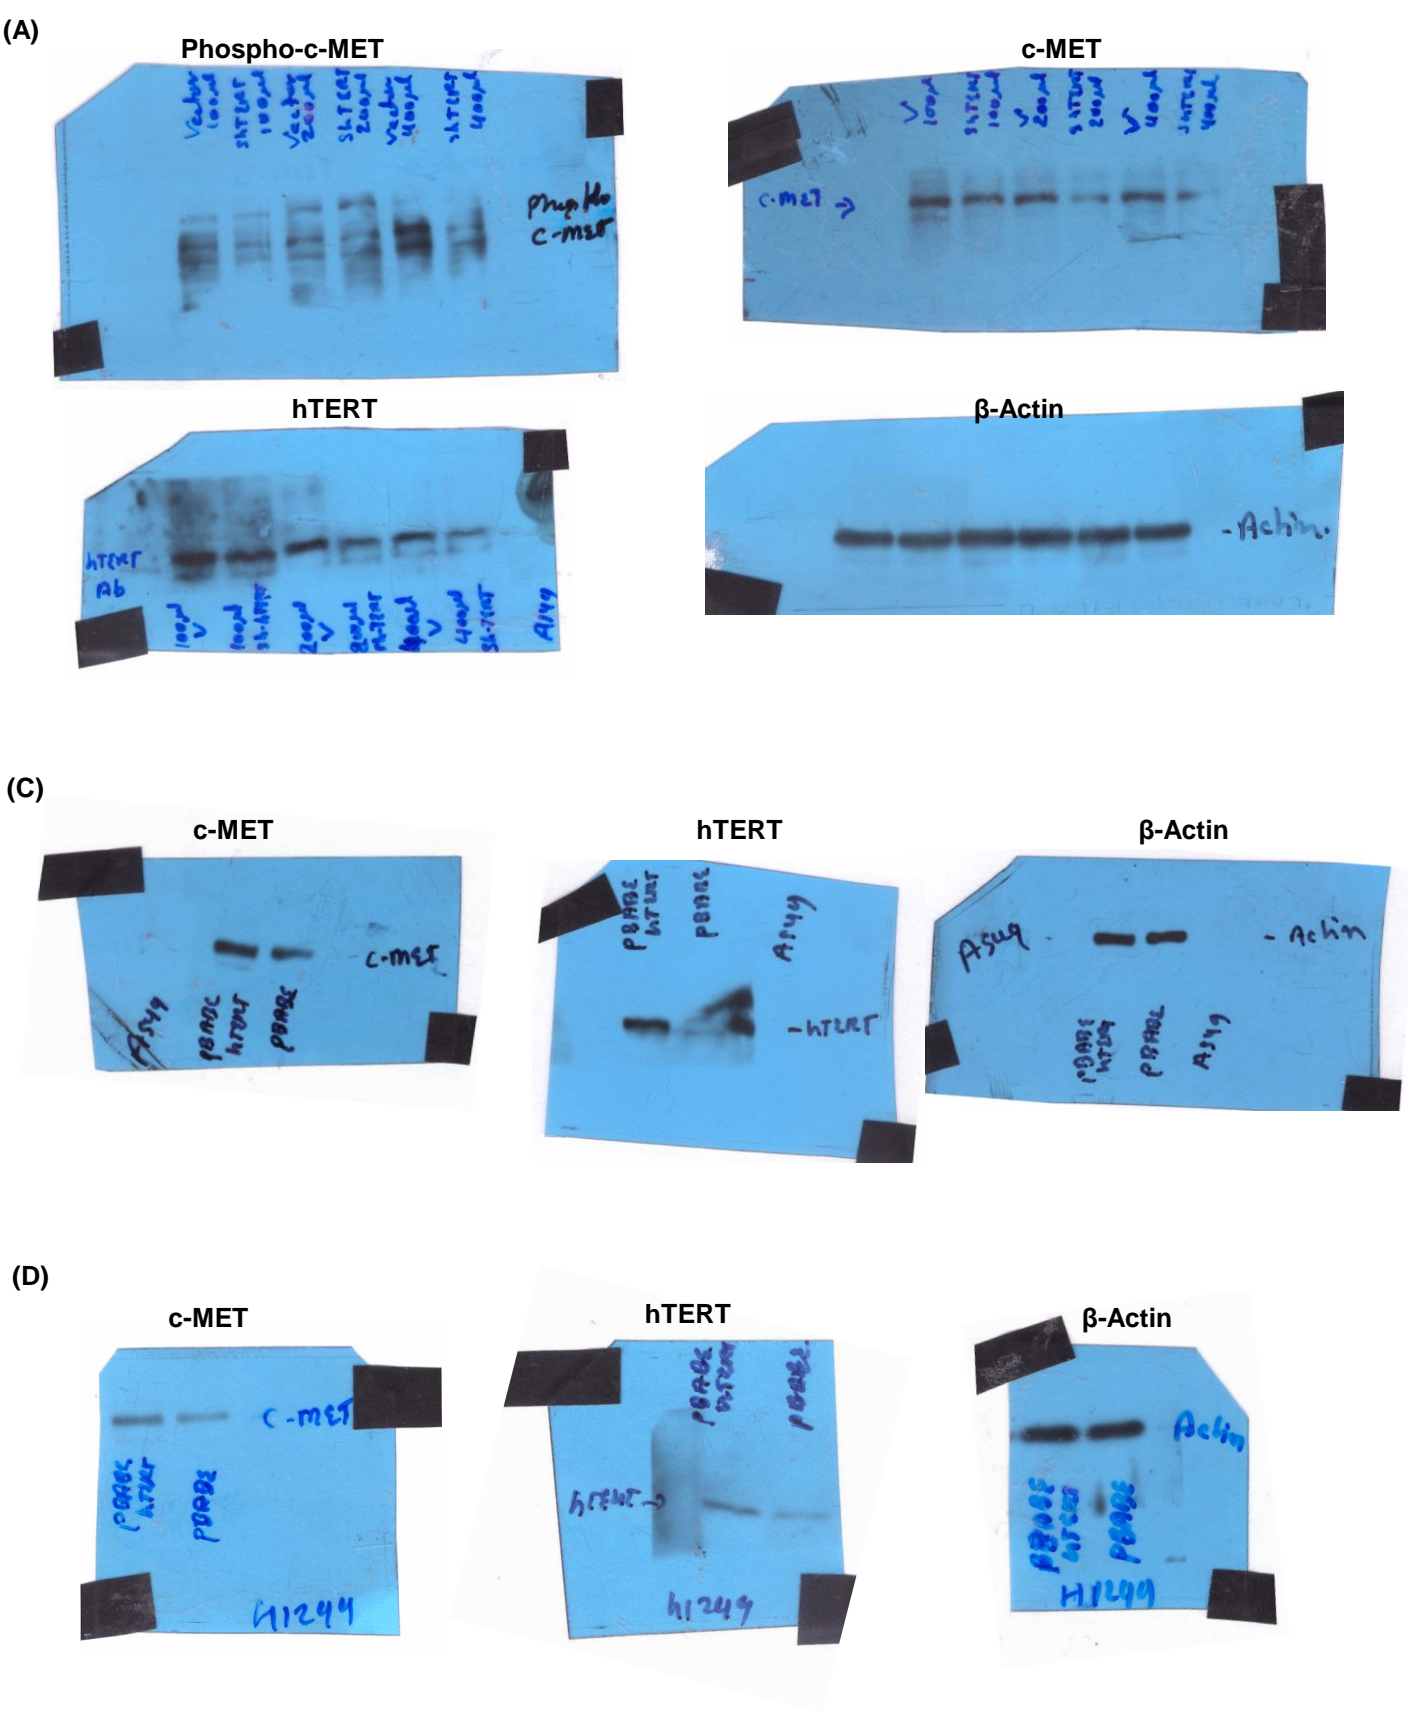

(F)

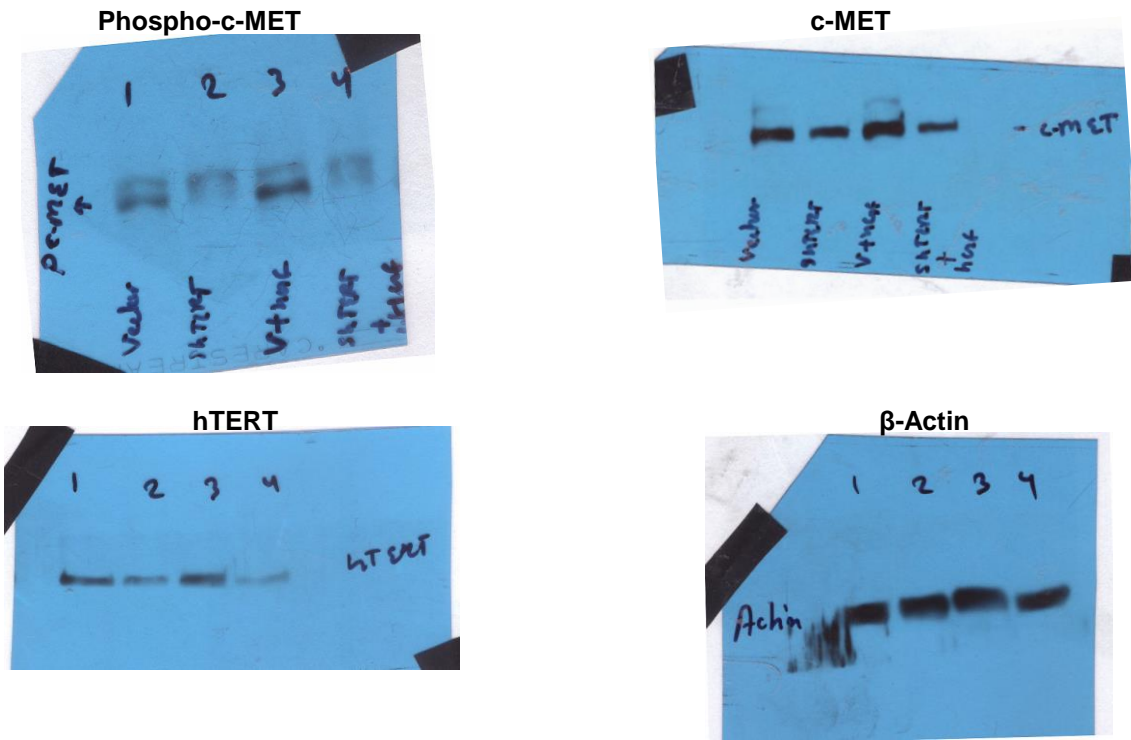

(G)

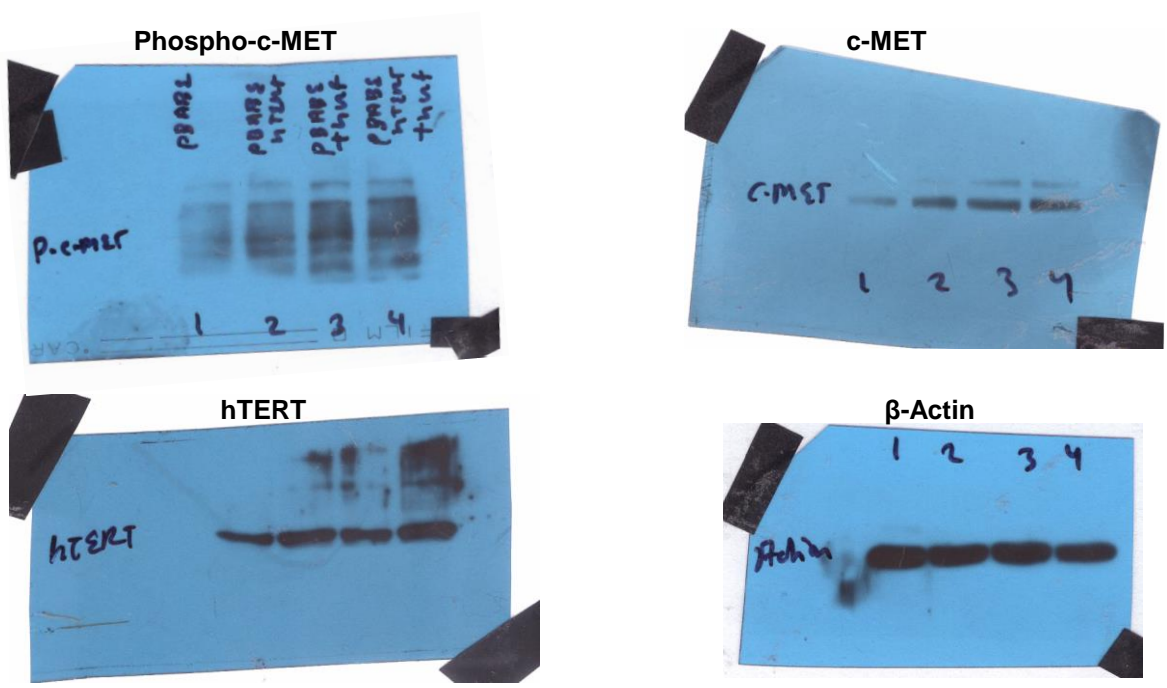

Fig. SM 3

p53 and c-Myc play a critical role in hTERT mediated regulation of c-MET expression (Figure 4).

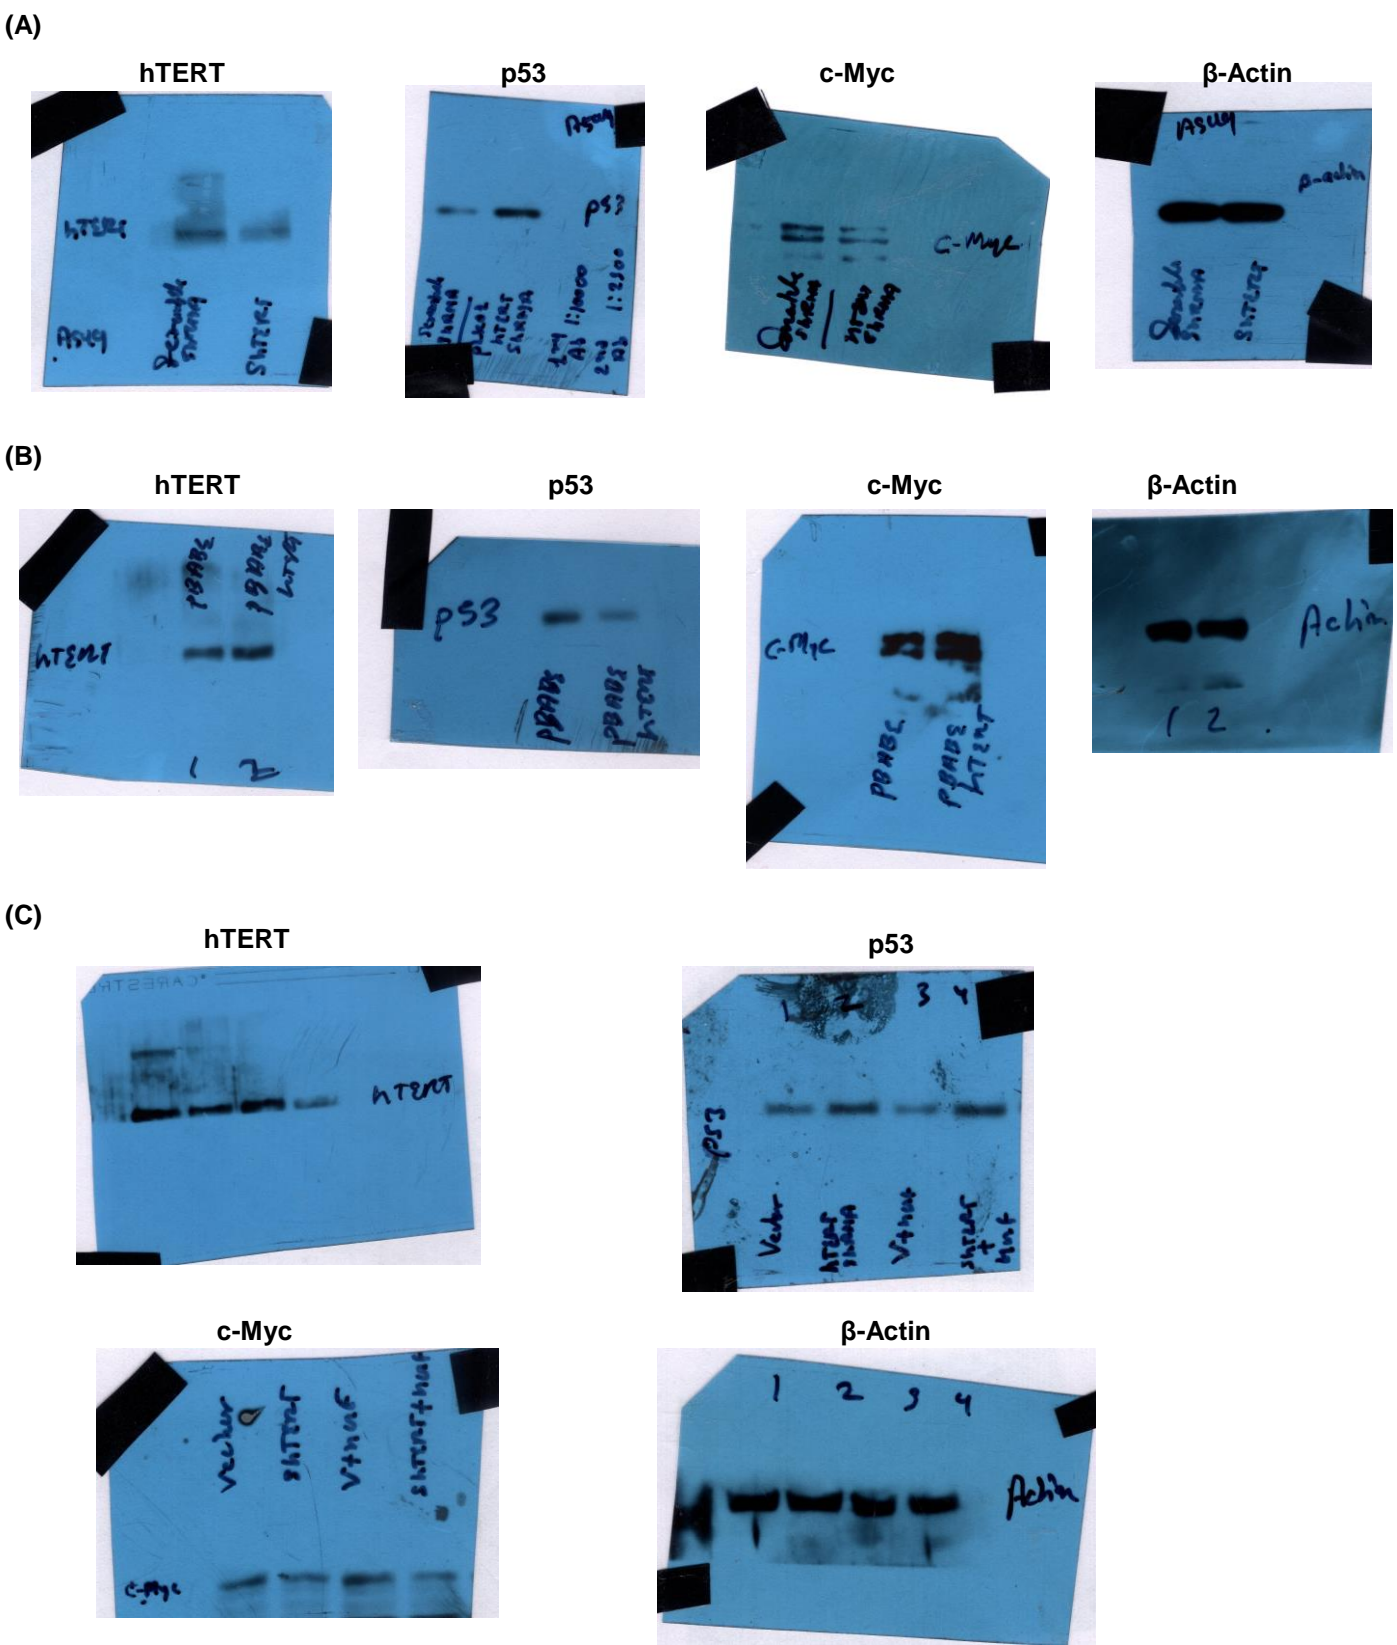

(D)

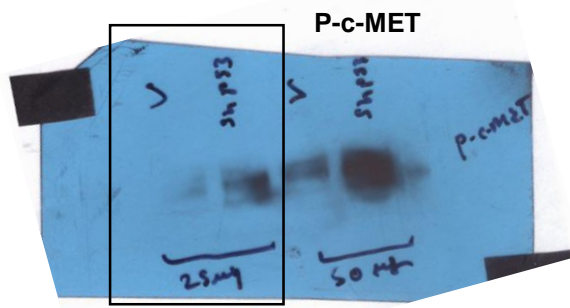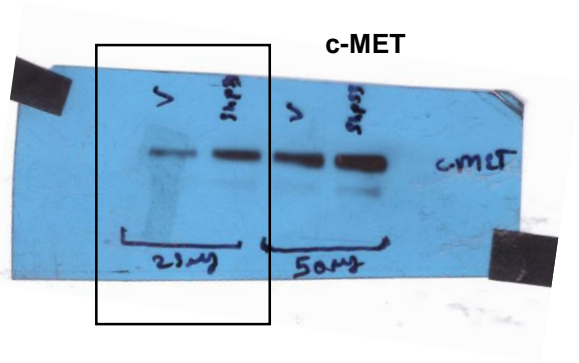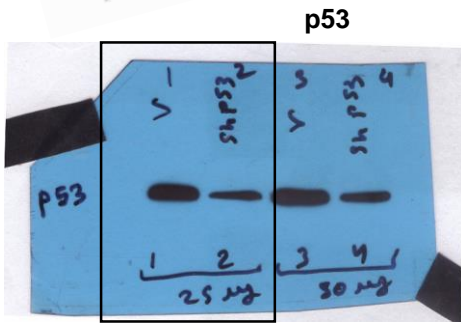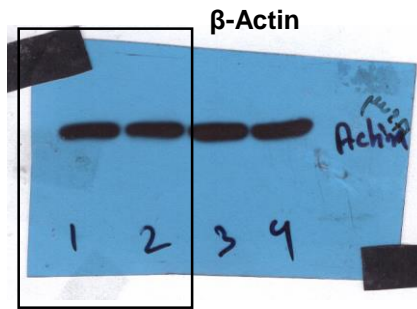

(E)

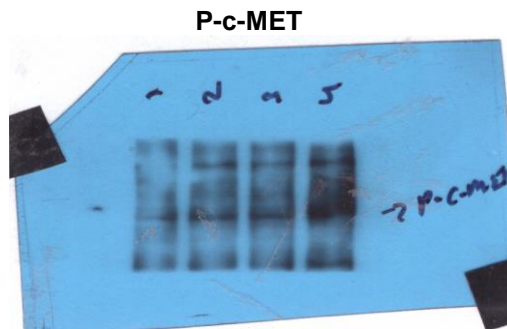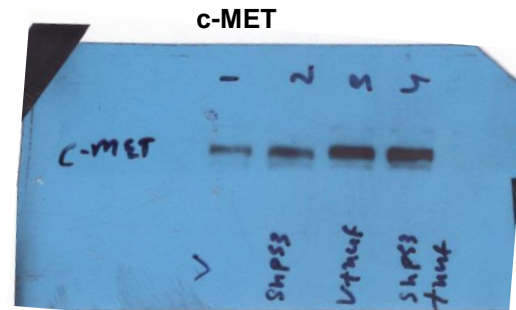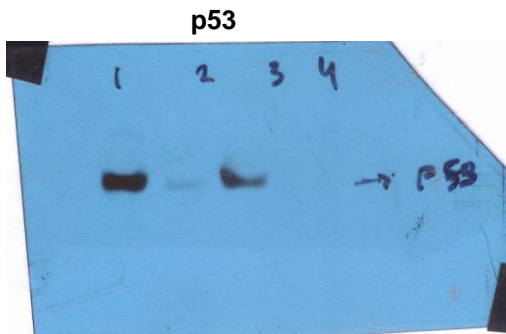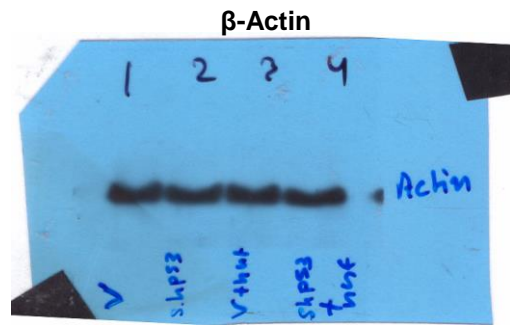

(F)

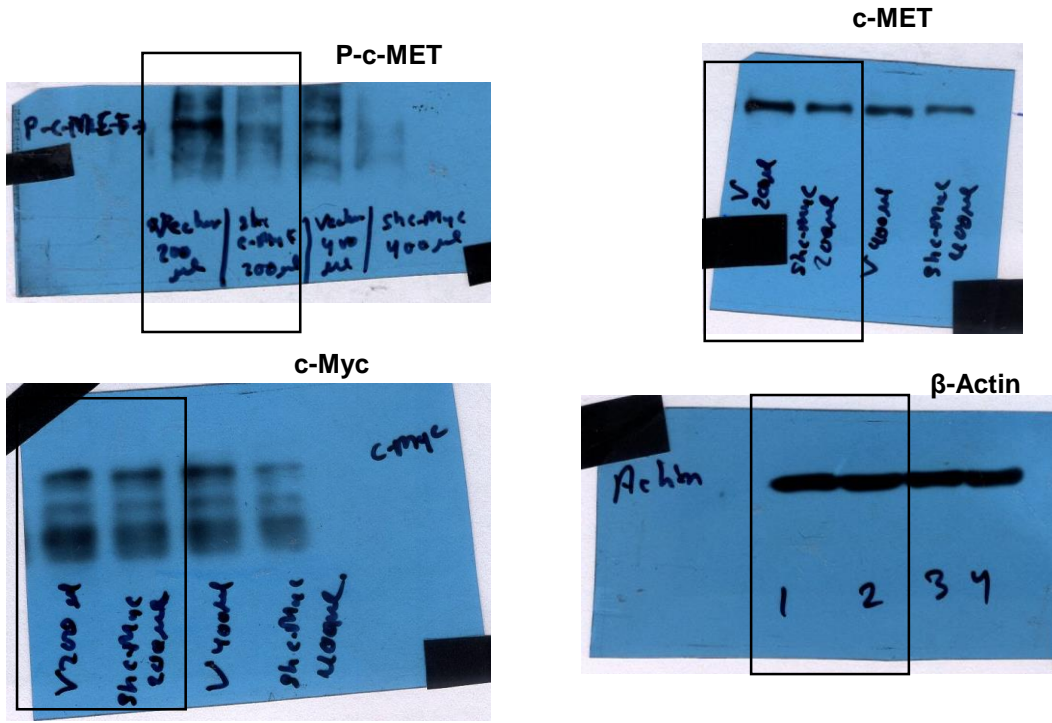

(G)

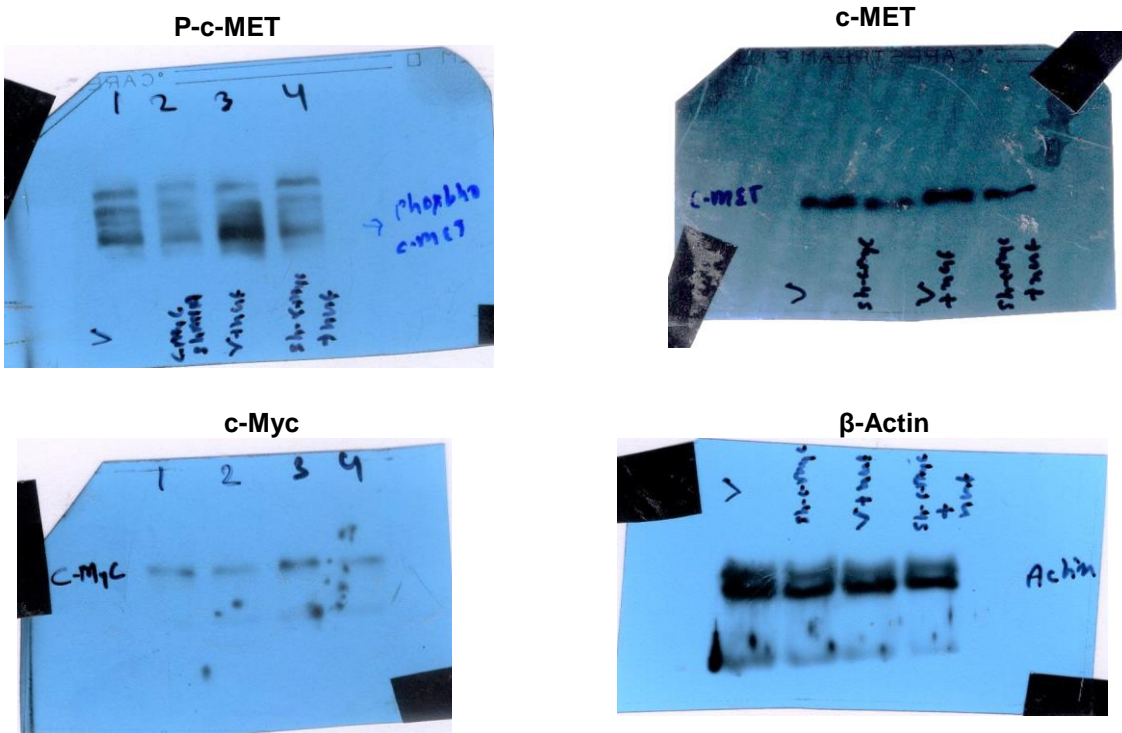

Fig. SM 4

c-MET induced EMT is positively associated with hTERT expression (Figure 5).

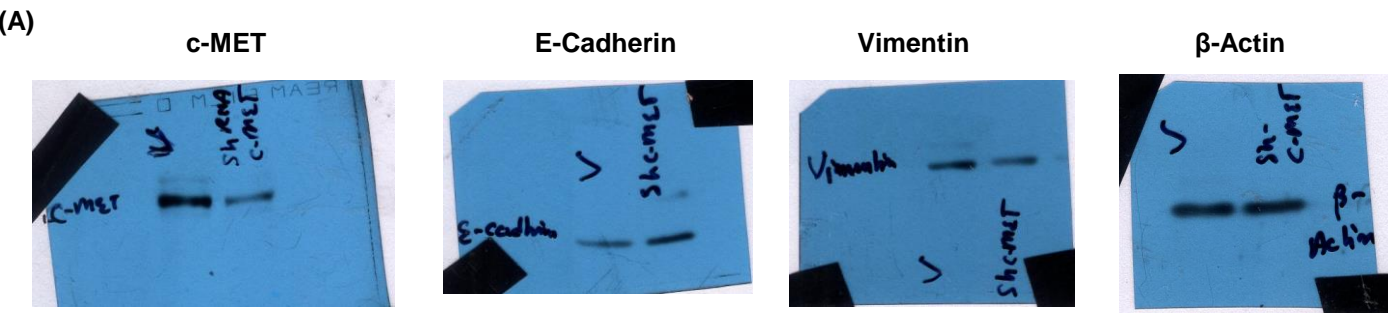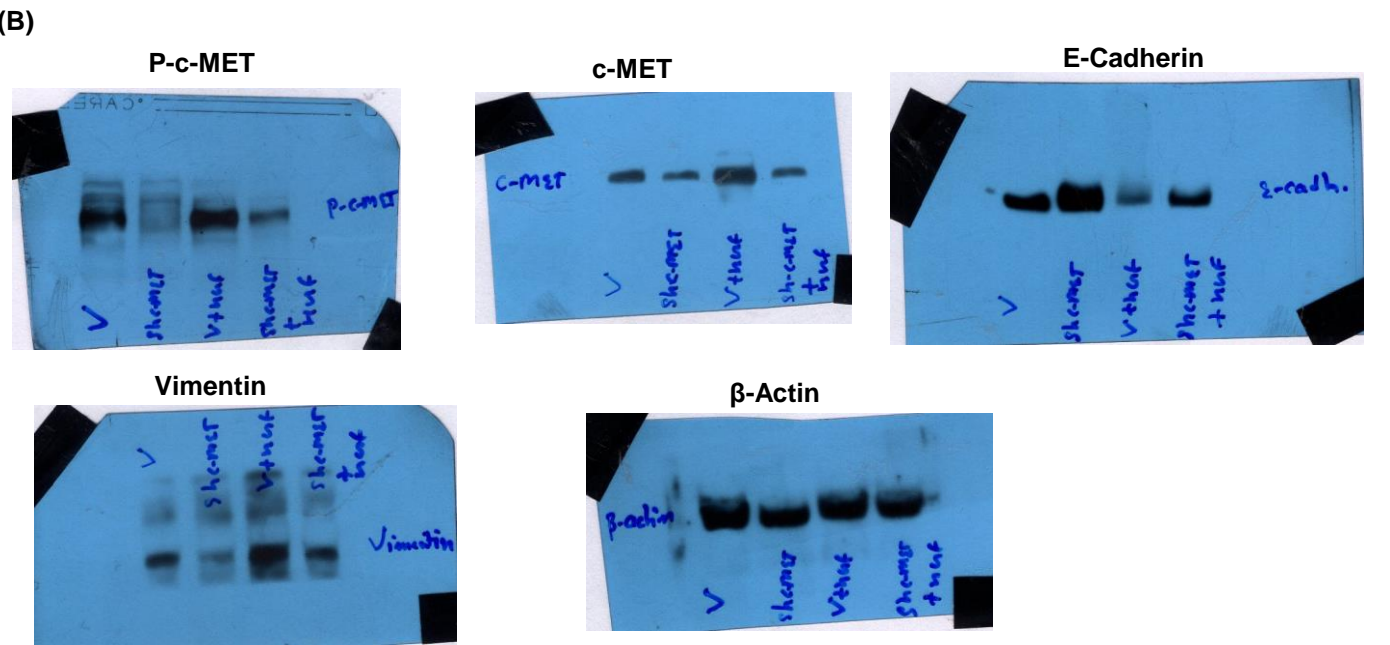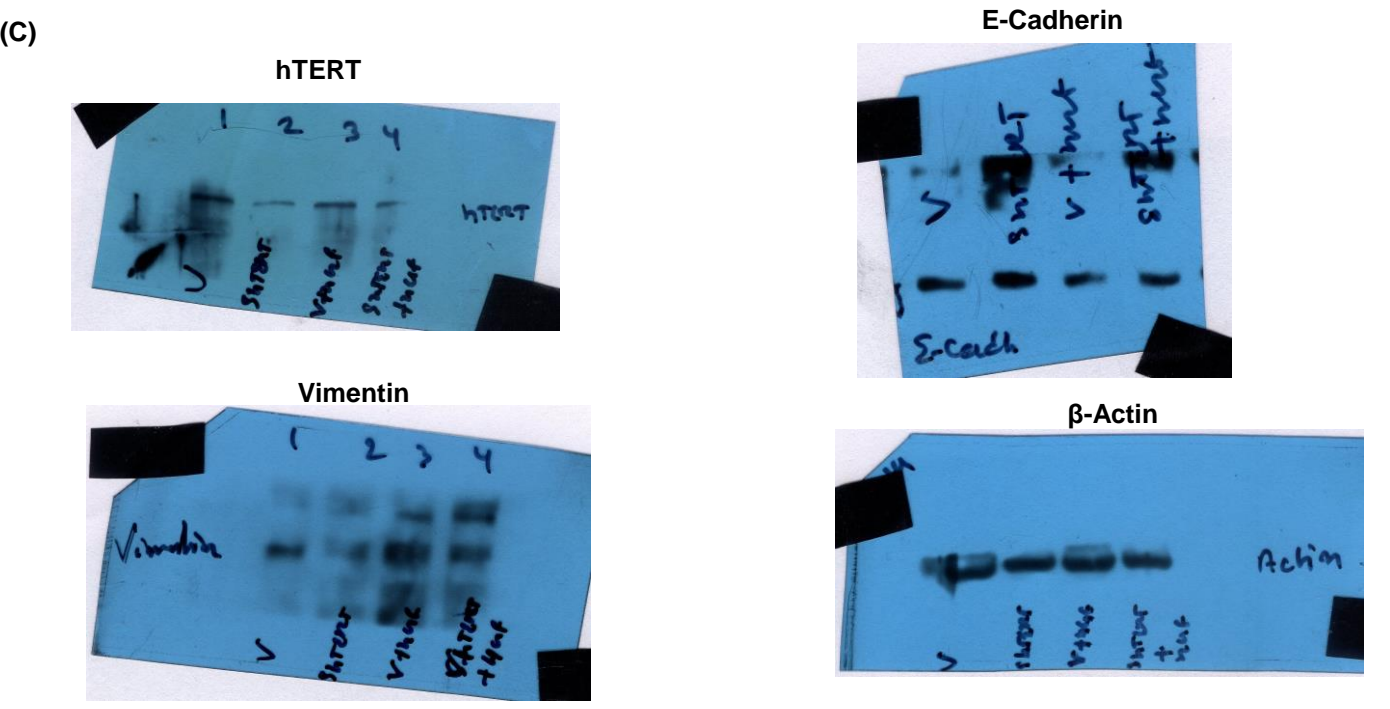

(E)

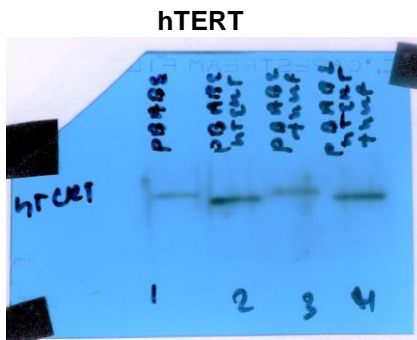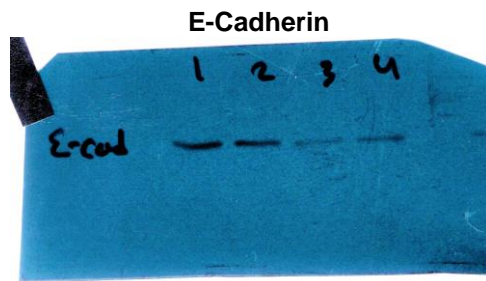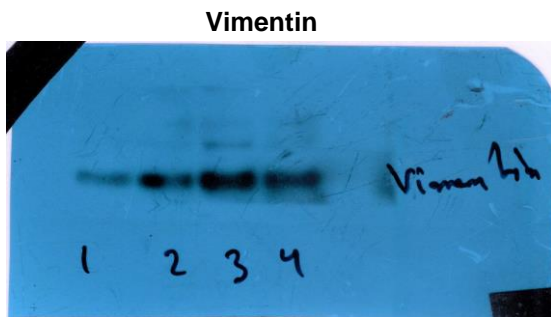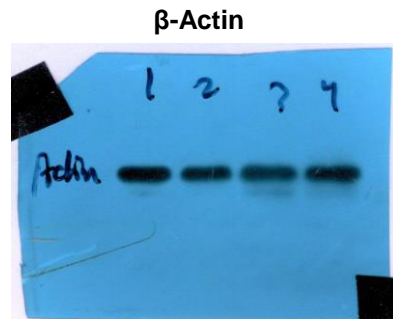

(F)

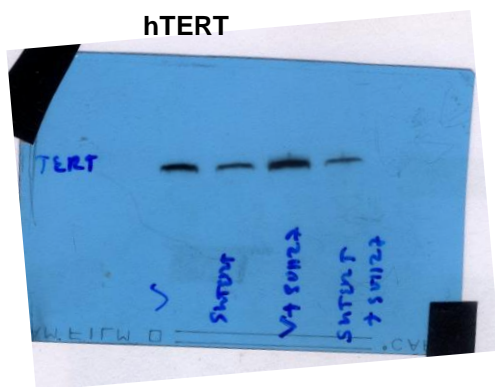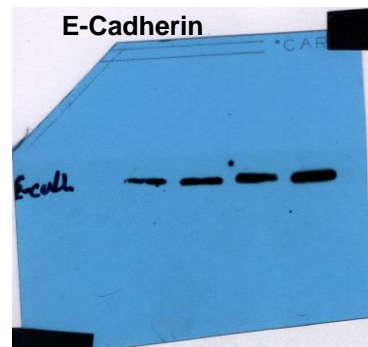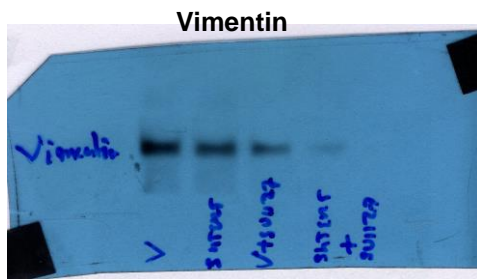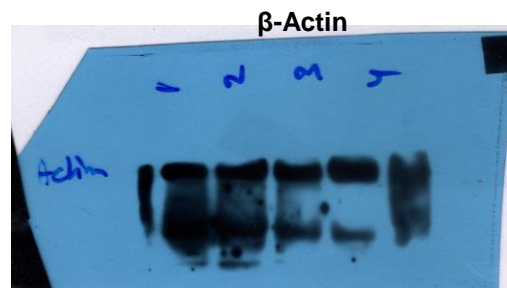



(G)

hTERT

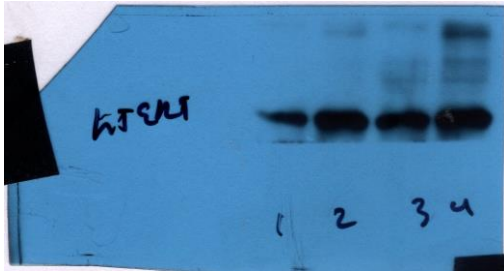

E-cadherin

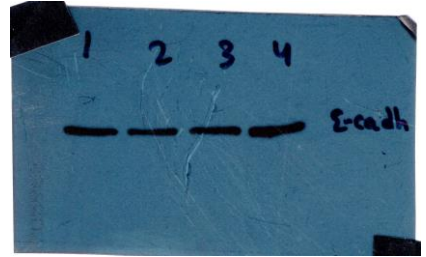

Vimentin

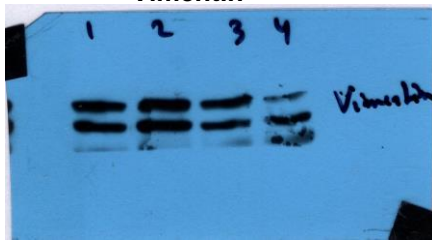

$\beta$ -Actin

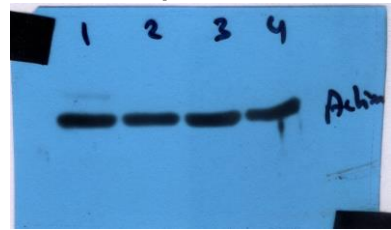

Fig. SM 5

SU11274 treatment in A549 cells reduced the expression of c-MET expression (Supplementary Figure 2).

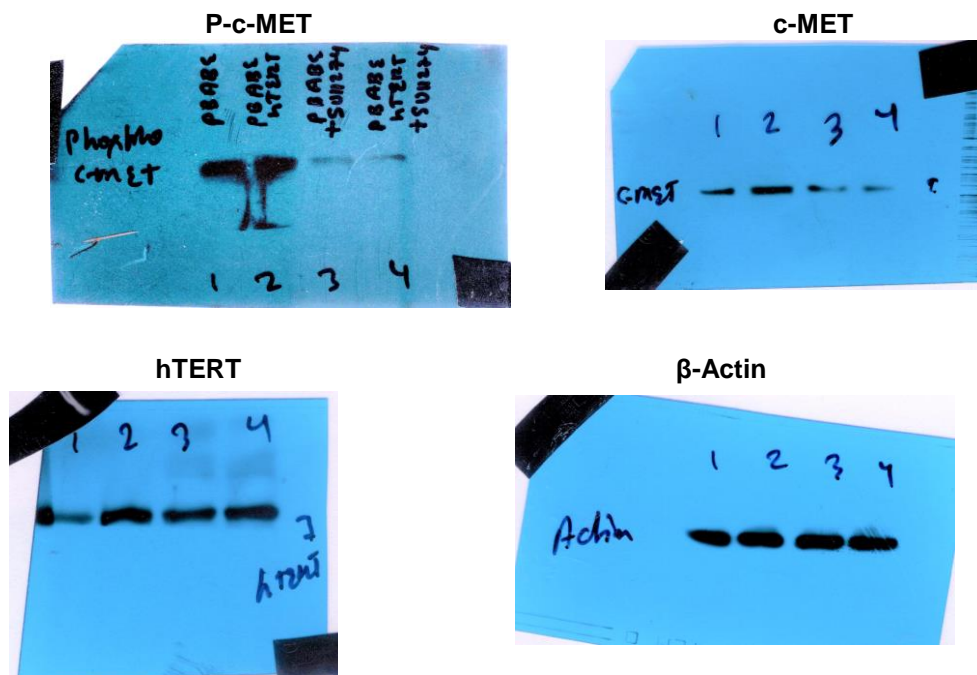

Fig. SM 6

p53 and c-Myc expression is associated with c-MET expression in cancer cells (Supplementary Figure 3).

(A)

A549

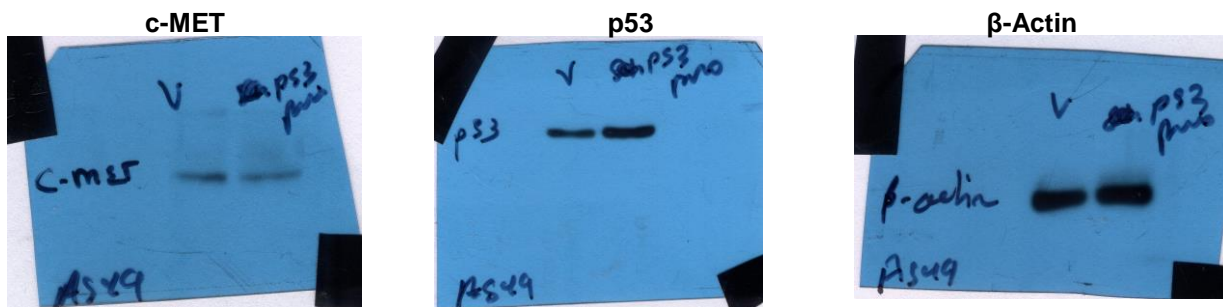

H1299

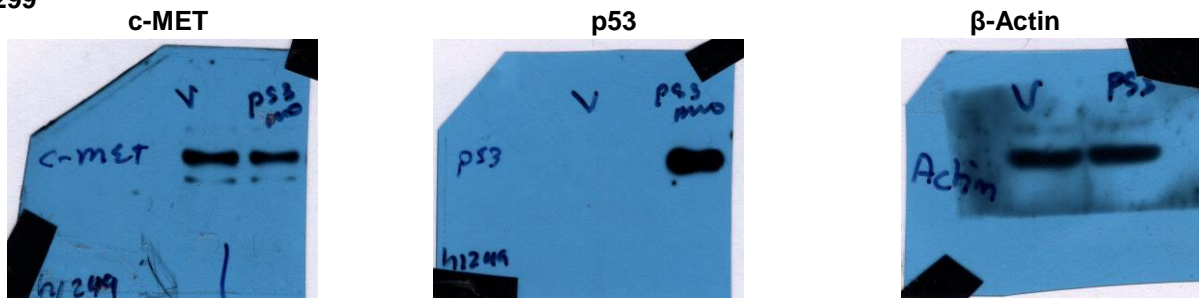

(B)

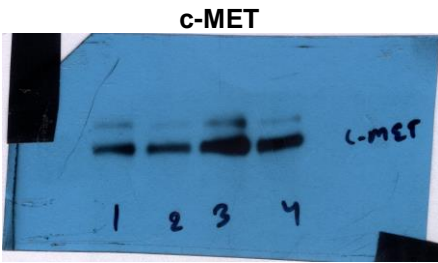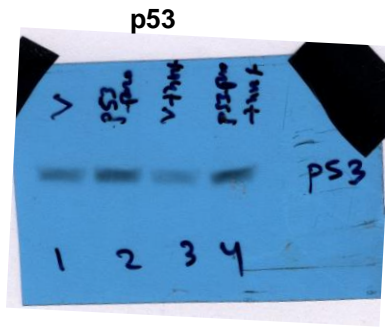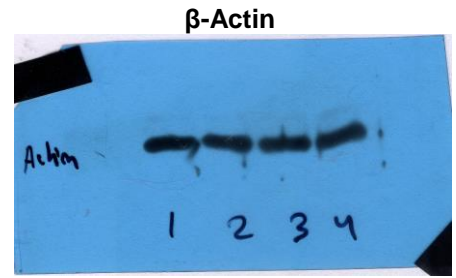

(C)

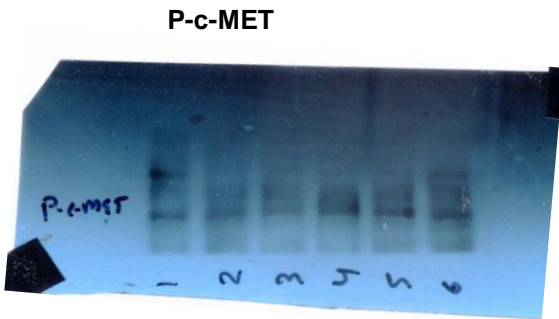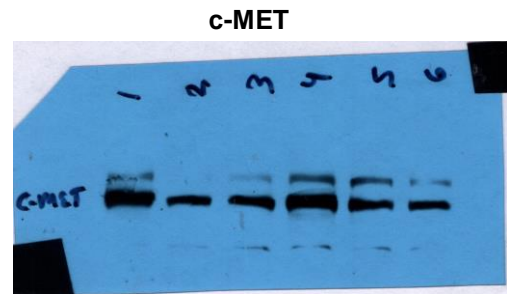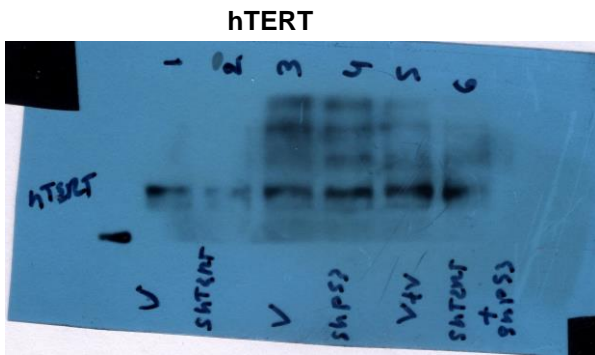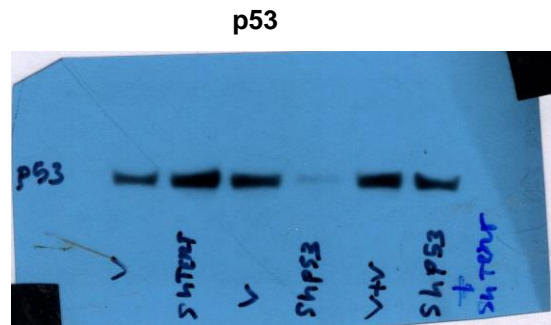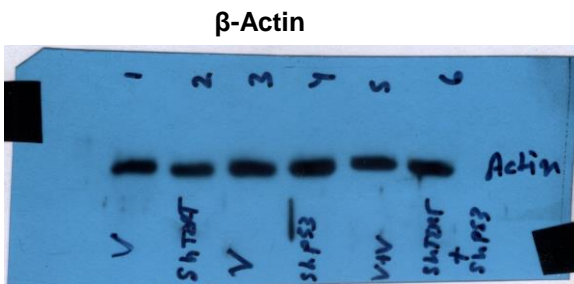

(D)

P-c-MET

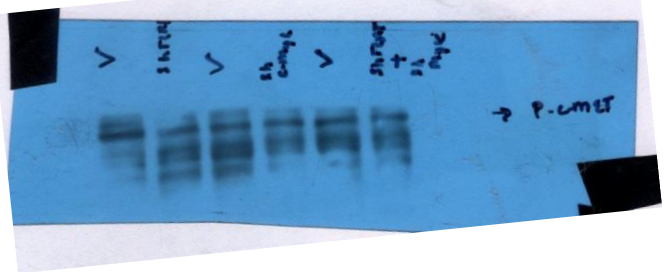

c-MET

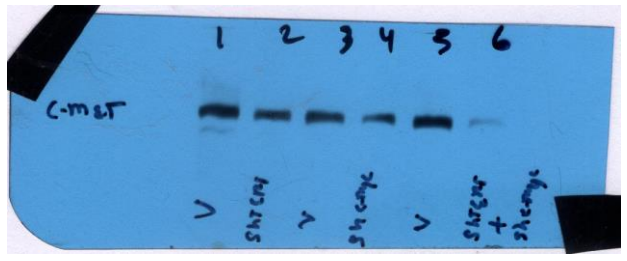

hTERT

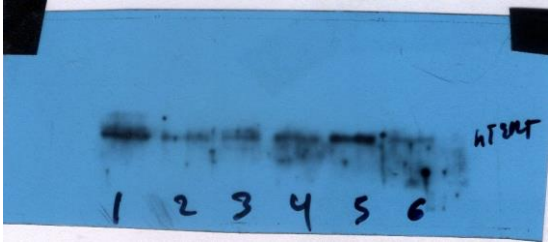

c-Myc

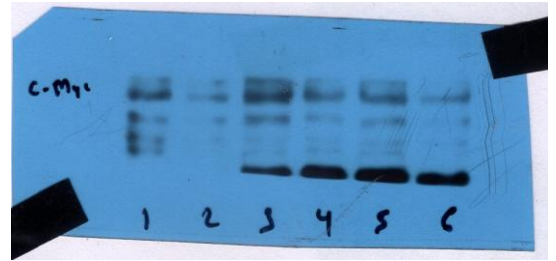

$\beta$ -Actin

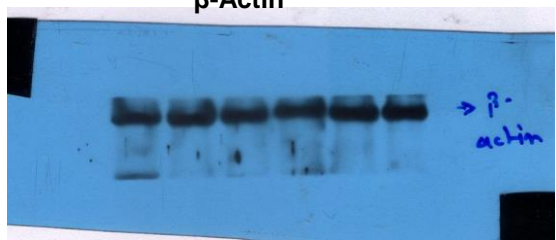

Fig. SM 7

c-MET activation is essential for hTERT mediated EMT (Supplementary Figure 4).

(B)

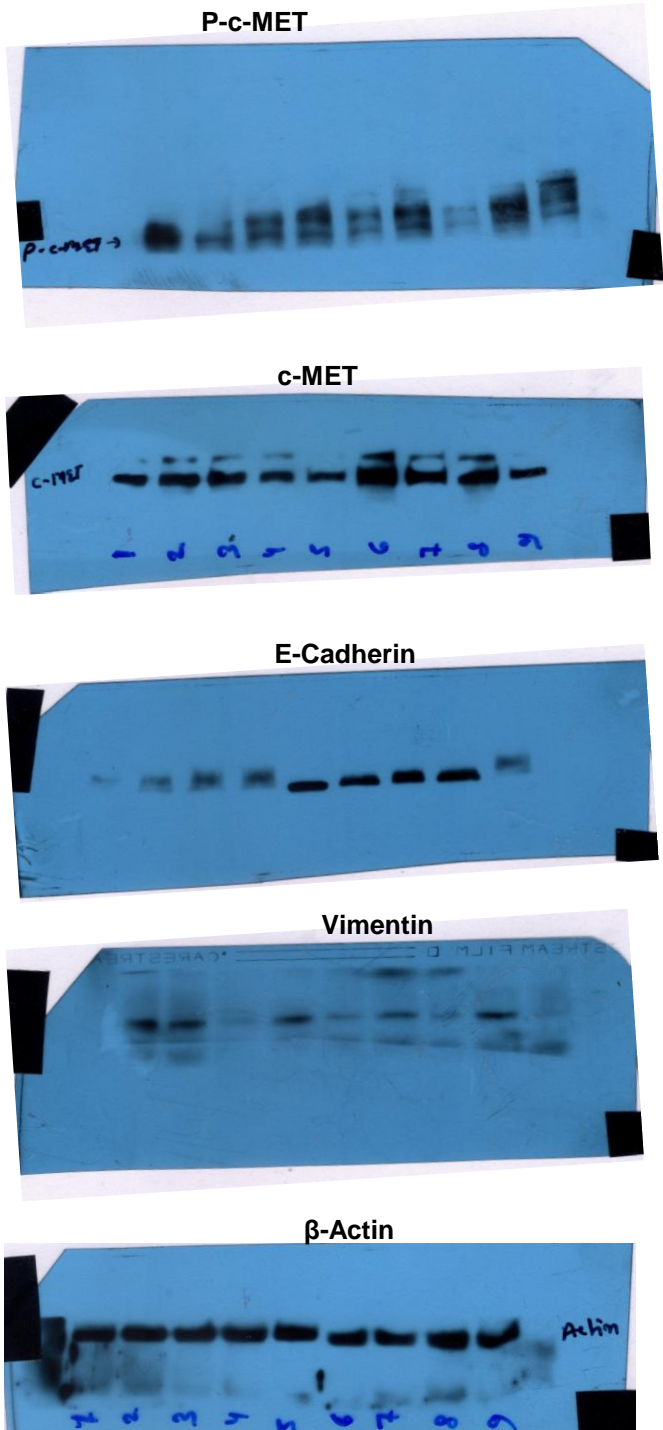

Fig. SM 8

p53 and c-Myc are associated with HGF/c-MET induced EMT (Supplementary Figure 5).

(A)

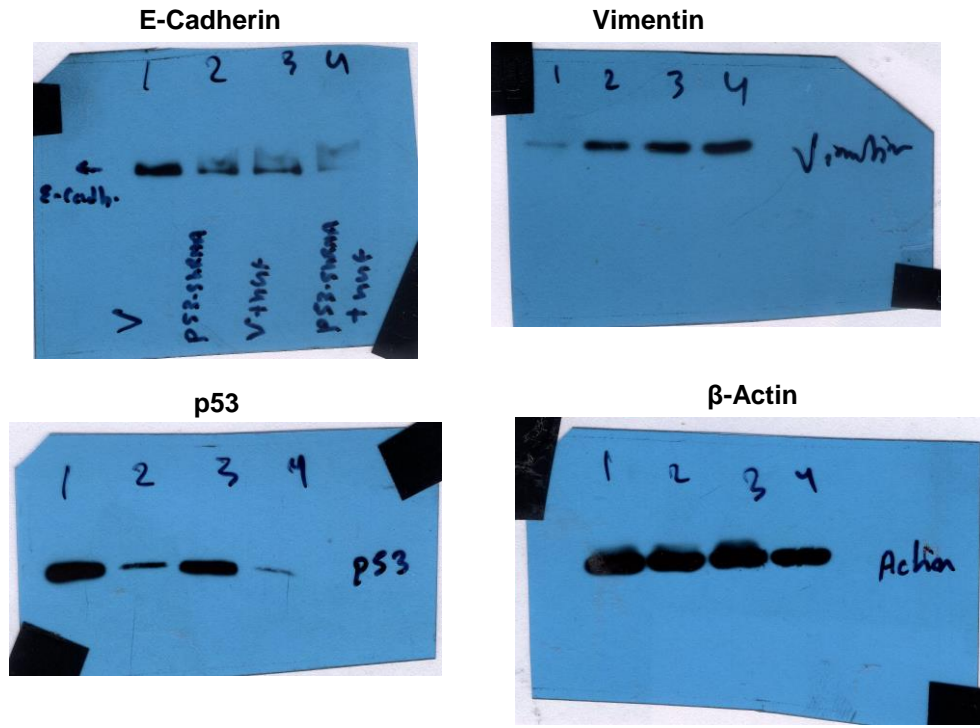

(C)

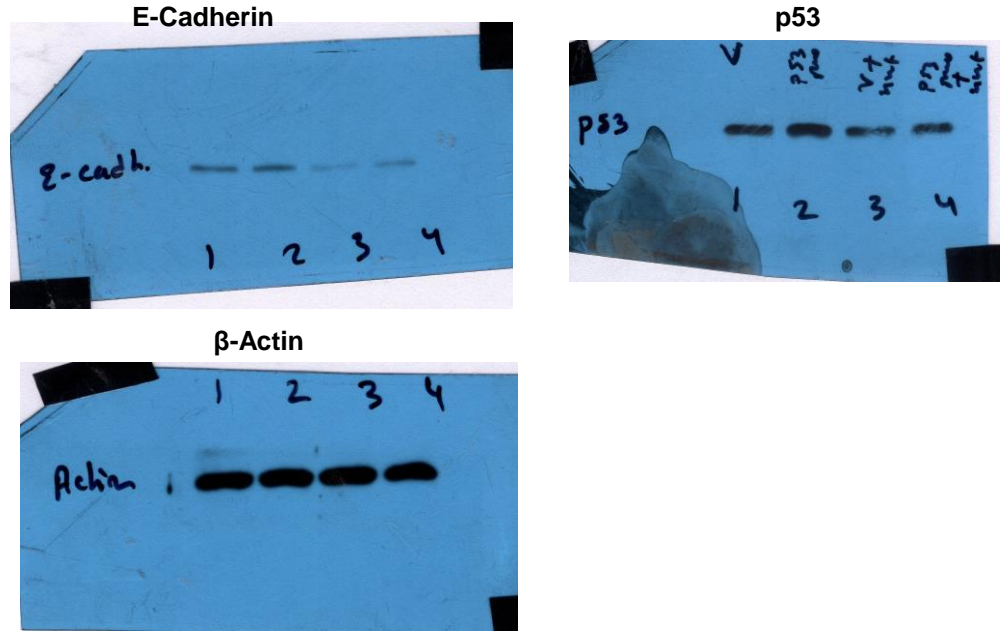

(E)

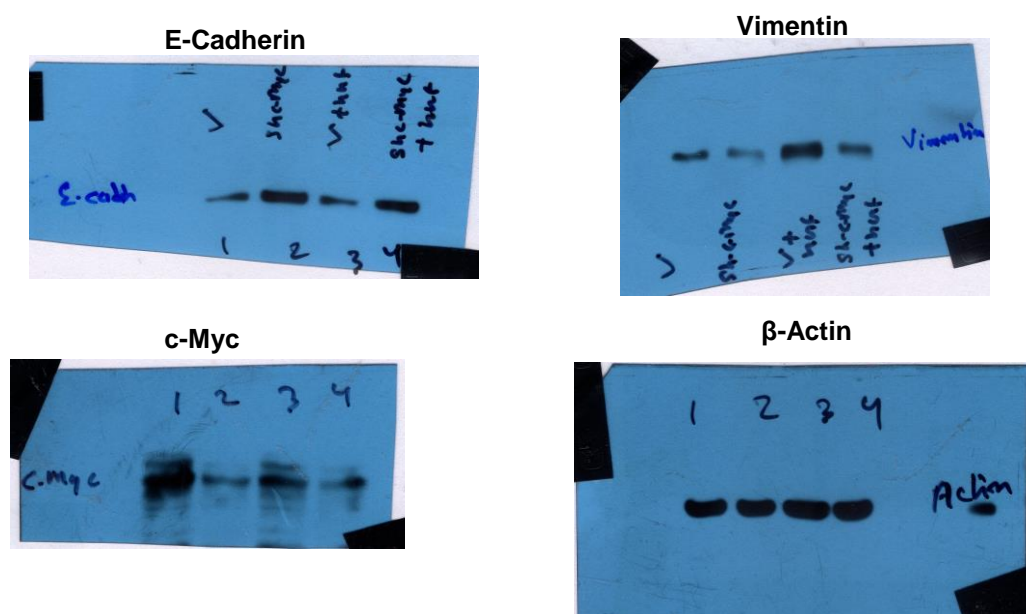

Fig. SM 9

Wild-type p53 works as suppressor protein for c-MET expression (Supplementary Figure 6).

(A)

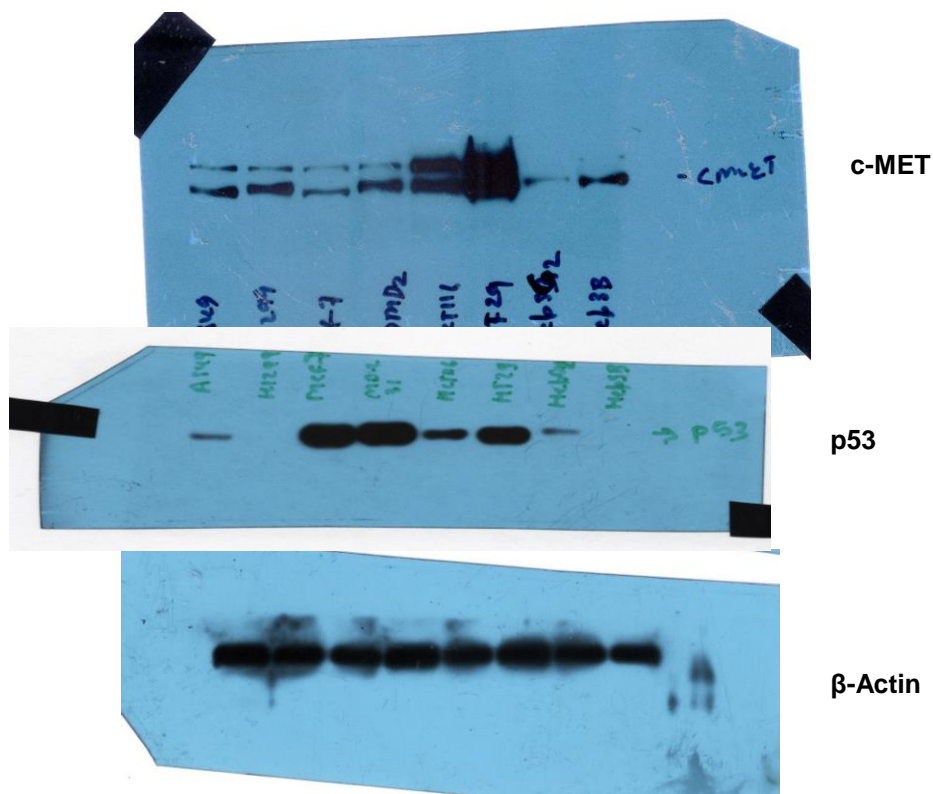

Supplement: mmc1.pdf [file mmc1.pdf]
